# Supplementary material
Source: PubMed Central journal article supplement (PMC6284241)
Supplement: NIHMS1502103-supplement-1.pdf [file NIHMS1502103-supplement-1.pdf]

|                                                   |           |           |       |            |        |          |          |      |            |       |       |
|---------------------------------------------------|-----------|-----------|-------|------------|--------|----------|----------|------|------------|-------|-------|
| Multiple sex partners (3+), yes                   | 58(21.8)  | 51(19.2)  | -2.6  | -9.5,4.2   | 0.452  | 20(23.8) | 22(26.2) | +2.4 | -10.7,15.5 | 0.722 | 0.506 |
| Casual sex partners, yes                          | 130(48.9) | 118(44.4) | -4.5  | -13.0,4.0  | 0.297  | 42(50.0) | 45(53.6) | +3.6 | -11.5,18.7 | 0.643 | 0.360 |
| Inconsistent condom use with casual partners, yes | 127(47.7) | 86(32.3)  | -15.4 | -23.6,-7.2 | <0.001 | 42(50.0) | 36(42.9) | -7.1 | -22.2,7.9  | 0.353 | 0.344 |

¶ Changes are only among the 350 men retained i.e. those seen at the baseline visit (07/2013-01/2015) and follow up visit (02/2015-09/2016)

$\Delta_{uc}$  Change in the uncircumcised group (proportion engaging in sexual risk behavior at follow up minus proportion at baseline)

$\Delta_c$  Change in the circumcised group (proportion engaging in sexual risk behavior at follow up minus proportion at baseline)

**Table 4: Association between circumcision of HIV +ve men and subsequent sexual risk behaviors, circumcised versus uncircumcised ¶**

| Sexual risk behavior in last 12 months       | Unadjusted |           |         | Adjusted <sup>a,§</sup> |           |         |
|----------------------------------------------|------------|-----------|---------|-------------------------|-----------|---------|
|                                              | PR         | 95% CI    | p-value | PR                      | 95% CI    | p-value |
| Sexual activity                              | 1.02       | 0.96,1.10 | 0.384   | 0.99                    | 0.94,1.05 | 0.790   |
| Alcohol before sex                           | 0.89       | 0.70,1.13 | 0.352   | 0.94                    | 0.75,1.18 | 0.613   |
| Transactional sex                            | 1.58       | 1.01,2.48 | 0.045   | 1.54                    | 1.06,2.23 | 0.022   |
| Multiple sexual partners (3+)                | 1.36       | 0.88,2.11 | 0.161   | 1.39                    | 0.92,2.10 | 0.115   |
| Casual sex partners                          | 1.21       | 0.95,1.54 | 0.124   | 1.19                    | 0.96,1.48 | 0.118   |
| Inconsistent condom use with casual partners | 1.33       | 0.98,1.79 | 0.068   | 1.25                    | 0.94,1.67 | 0.131   |

¶ Associations are only among the 350 men retained i.e. those seen at the baseline visit (07/2013-01/2015) and follow up visit (02/2015-09/2016)

<sup>a</sup> Adjusted for baseline age, marital status, community type, education status, religion, enrollment in HIV care, additional exposure to targeted messaging in the stylish living campaign, as well as the respective behavior at baseline

§ Full results for each adjusted model are included in supplements (Supplemental Table 1)

## Supplements

**Supplemental Table 1: Association between circumcision of HIV +ve men and subsequent sexual risk behaviors, circumcised versus uncircumcised ¶**

|                            | (1)<br>Sexual activity | (2)<br>Alcohol before sex | (3)<br>Transactional sex | (4)<br>Multiple sex partners | (5)<br>Casual sex partners | (6)<br>Inconsistent condom use with casual partners |
|----------------------------|------------------------|---------------------------|--------------------------|------------------------------|----------------------------|-----------------------------------------------------|
| <b>Circumcision status</b> |                        |                           |                          |                              |                            |                                                     |
| uncircumcised              | 1                      | [1,1]                     | 1                        | [1,1]                        | 1                          | [1,1]                                               |
| circumcised                | 0.992                  | [0.935,1.053]             | 0.943                    | [0.750,1.184]                | 1.541*                     | [1.065,2.231]                                       |
| <b>increasing age</b>      | 0.997                  | [0.993,1.002]             | 1.002                    | [0.989,1.016]                | 0.981                      | [0.946,1.017]                                       |
| <b>Marital status</b>      |                        |                           |                          |                              |                            |                                                     |
| unmarried                  | 1                      | [1,1]                     | 1                        | [1,1]                        | 1                          | [1,1]                                               |
| married                    | 1.042                  | [0.975,1.114]             | 0.909                    | [0.755,1.093]                | 0.976                      | [0.619,1.537]                                       |
| never married              | 0.967                  | [0.756,1.237]             | 0.853                    | [0.470,1.548]                | 1.657                      | [0.860,3.194]                                       |
| <b>Community</b>           |                        |                           |                          |                              |                            |                                                     |
| non-fishing                | 1                      | [1,1]                     | 1                        | [1,1]                        | 1                          | [1,1]                                               |
| fishing                    | 1.049                  | [0.980,1.123]             | 0.907                    | [0.749,1.098]                | 2.351                      | [0.876,6.311]                                       |
| <b>Education</b>           |                        |                           |                          |                              |                            |                                                     |
| none                       | 1                      | [1,1]                     | 1                        | [1,1]                        | 1                          | [1,1]                                               |
| primary school             | 0.989                  | [0.913,1.072]             | 1.470*                   | [1.056,2.048]                | 1.131                      | [0.664,1.929]                                       |
| secondary school or higher | 0.996                  | [0.908,1.092]             | 1.008                    | [0.664,1.531]                | 1.236                      | [0.440,3.470]                                       |
| <b>Religion</b>            |                        |                           |                          |                              |                            |                                                     |
| catholic                   | 1                      | [1,1]                     | 1                        | [1,1]                        | 1                          | [1,1]                                               |
| protestant                 | 0.984                  | [0.916,1.057]             | 1.133                    | [0.919,1.397]                | 1.128                      | [0.677,1.881]                                       |
| other                      | 1.023                  | [0.957,1.094]             | 1.000                    | [0.508,1.969]                | 0.534                      | [0.0611,4.660]                                      |

|                                      |          |               |          |               |          |                |          |               |          |               |          |               |
|--------------------------------------|----------|---------------|----------|---------------|----------|----------------|----------|---------------|----------|---------------|----------|---------------|
| <b>Stylish campaign<sup>∞</sup></b>  |          |               |          |               |          |                |          |               |          |               |          |               |
| Participated                         | 1        | [1,1]         | 1        | [1,1]         | 1        | [1,1]          | 1        | [1,1]         | 1        | [1,1]         | 1        | [1,1]         |
| Heard, did not participate           | 1.052    | [0.971,1.139] | 0.941    | [0.715,1.238] | 1.757    | [0.782,3.949]  | 1.143    | [0.577,2.263] | 1.029    | [0.699,1.514] | 1.036    | [0.674,1.592] |
| Never heard                          | 0.992    | [0.917,1.072] | 0.975    | [0.748,1.271] | 2.797**  | [1.377,5.682]  | 1.442    | [0.778,2.671] | 1.249    | [0.895,1.742] | 1.091    | [0.736,1.619] |
| Missing (Unknown)                    | 1.153    | [0.964,1.380] | 0.805    | [0.446,1.451] | 2.222    | [0.218,22.62]  | 0.695    | [0.101,4.782] | 0.924    | [0.339,2.517] | 0.780    | [0.204,2.986] |
| <b>HIV care</b>                      |          |               |          |               |          |                |          |               |          |               |          |               |
| Yes, with ART                        | 1        | [1,1]         | 1        | [1,1]         | 1        | [1,1]          | 1        | [1,1]         | 1        | [1,1]         | 1        | [1,1]         |
| Yes, with Septrin only               | 1.012    | [0.943,1.087] | 0.925    | [0.731,1.170] | 1.012    | [0.637,1.608]  | 0.809    | [0.491,1.332] | 0.990    | [0.779,1.257] | 1.090    | [0.795,1.493] |
| Yes, but no Septrin or ART           | 1.012    | [0.960,1.066] | 0.994    | [0.826,1.196] | 0.659    | [0.389,1.118]  | 1.170    | [0.714,1.918] | 0.961    | [0.745,1.239] | 0.964    | [0.683,1.360] |
| Never                                | 0.897    | [0.711,1.133] | 0.765    | [0.442,1.324] | 0.934    | [0.504,1.731]  | 2.307    | [0.912,5.841] | 1.029    | [0.670,1.582] | 0.795    | [0.322,1.964] |
| <b>Baseline behavior<sup>§</sup></b> |          |               |          |               |          |                |          |               |          |               |          |               |
| No                                   | 1        | [1,1]         | 1        | [1,1]         | 1        | [1,1]          | 1        | [1,1]         | 1        | [1,1]         | 1        | [1,1]         |
| Yes                                  | 2.782*** | [1.581,4.893] | 3.062*** | [2.311,4.055] | 3.728*** | [2.433,5.713]  | 3.364*** | [2.214,5.112] | 2.659*** | [1.974,3.582] | 2.557*** | [1.790,3.653] |
| Missing                              |          |               |          |               | 0.396    | [0.0474,3.309] |          |               |          |               |          |               |
| Observations                         | 350      |               | 350      |               | 350      |                | 350      |               | 350      |               | 350      |               |

Exponentiated coefficients; 95% confidence intervals in brackets

\*  $p < 0.05$ , \*\*  $p < 0.01$ , \*\*\*  $p < 0.001$

¶ Associations are only among the 350 men retained i.e. those seen at the baseline visit (07/2013-01/2015) and follow up visit (02/2015-09/2016)

§ Baseline behavior refers to the respective sexual risk behavior at the baseline visit (Visit 1)

## Supplemental Table 2: Sensitivity analyses for association between circumcision of HIV +ve men and subsequent sexual risk behaviors, circumcised versus uncircumcised

|                                     | (1)<br>Sexual activity | (2)<br>Alcohol before sex | (3)<br>Transactional sex | (4)<br>Multiple sex partners | (5)<br>Casual sex partners | (6)<br>Inconsistent condom use with casual partners |
|-------------------------------------|------------------------|---------------------------|--------------------------|------------------------------|----------------------------|-----------------------------------------------------|
| <b>Circumcision status</b>          |                        |                           |                          |                              |                            |                                                     |
| uncircumcised                       | 1                      | [1,1]                     | 1                        | [1,1]                        | 1                          | [1,1]                                               |
| circumcised                         | 1.000                  | [0.923,1.082]             | 0.932                    | [0.755,1.151]                | 1.426                      | [0.977,2.080]                                       |
| <b>increasing age</b>               | 0.997                  | [0.991,1.004]             | 1.002                    | [0.988,1.016]                | 0.984                      | [0.951,1.017]                                       |
| <b>Marital status</b>               |                        |                           |                          |                              |                            |                                                     |
| currently unmarried                 | 1                      | [1,1]                     | 1                        | [1,1]                        | 1                          | [1,1]                                               |
| currently married                   | 1.053                  | [0.951,1.167]             | 0.934                    | [0.769,1.136]                | 1.032                      | [0.646,1.648]                                       |
| never married                       | 0.923                  | [0.685,1.243]             | 0.823                    | [0.469,1.142]                | 1.784                      | [0.877,3.629]                                       |
| <b>Community</b>                    |                        |                           |                          |                              |                            |                                                     |
| non-fishing                         | 1                      | [1,1]                     | 1                        | [1,1]                        | 1                          | [1,1]                                               |
| fishing                             | 1.038                  | [0.968,1.113]             | 0.930                    | [0.773,1.119]                | 2.383*                     | [1.089,5.215]                                       |
| <b>Education</b>                    |                        |                           |                          |                              |                            |                                                     |
| none                                | 1                      | [1,1]                     | 1                        | [1,1]                        | 1                          | [1,1]                                               |
| primary school                      | 0.978                  | [0.893,1.071]             | 1.428                    | [0.996,2.047]                | 1.087                      | [0.585,2.019]                                       |
| secondary school or higher          | 0.992                  | [0.883,1.115]             | 0.957                    | [0.619,1.480]                | 1.085                      | [0.395,2.979]                                       |
| <b>Religion</b>                     |                        |                           |                          |                              |                            |                                                     |
| catholic                            | 1                      | [1,1]                     | 1                        | [1,1]                        | 1                          | [1,1]                                               |
| protestant                          | 0.977                  | [0.891,1.070]             | 1.117                    | [0.909,1.371]                | 1.146                      | [0.765,1.715]                                       |
| other                               | 1.012                  | [0.877,1.167]             | 1.088                    | [0.637,1.858]                | 0.851                      | [0.194,3.737]                                       |
| <b>Stylish campaign<sup>∞</sup></b> |                        |                           |                          |                              |                            |                                                     |
| Participated                        | 1                      | [1,1]                     | 1                        | [1,1]                        | 1                          | [1,1]                                               |
| Heard, did not participate          | 1.073                  | [0.944,1.221]             | 0.933                    | [0.722,1.205]                | 1.579                      | [0.659,3.784]                                       |
| Never heard                         | 0.992                  | [0.869,1.132]             | 0.953                    | [0.739,1.228]                | 2.686*                     | [1.222,5.902]                                       |
| <b>HIV care</b>                     |                        |                           |                          |                              |                            |                                                     |
| Yes, with ART                       | 1                      | [1,1]                     | 1                        | [1,1]                        | 1                          | [1,1]                                               |
| Yes, with Septrin only              | 1.010                  | [0.919,1.110]             | 0.972                    | [0.778,1.216]                | 1.092                      | [0.696,1.713]                                       |
| Yes, but no Septrin or              | 1.020                  | [0.942,1.105]             | 1.034                    | [0.851,1.258]                | 0.726                      | [0.400,1.316]                                       |

|                           |                      |               |                      |               |                      |               |                      |               |                      |               |                      |               |
|---------------------------|----------------------|---------------|----------------------|---------------|----------------------|---------------|----------------------|---------------|----------------------|---------------|----------------------|---------------|
| ART                       |                      |               |                      |               |                      |               |                      |               |                      |               |                      |               |
| Never                     | 0.926                | [0.695,1.232] | 0.715                | [0.375,1.362] | 1.108                | [0.410,2.991] | 2.232                | [0.951,5.236] | 1.084                | [0.620,1.895] | 0.780                | [0.297,2.045] |
| <b>Baseline behavior§</b> |                      |               |                      |               |                      |               |                      |               |                      |               |                      |               |
| No                        | 1                    | [1,1]         | 1                    | [1,1]         | 1                    | [1,1]         | 1                    | [1,1]         | 1                    | [1,1]         | 1                    | [1,1]         |
| Yes                       | 2.999 <sup>***</sup> | [1.705,5.275] | 2.917 <sup>***</sup> | [2.245,3.792] | 3.169 <sup>***</sup> | [2.107,4.766] | 2.865 <sup>***</sup> | [2.023,4.059] | 2.240 <sup>***</sup> | [1.711,2.933] | 2.237 <sup>***</sup> | [1.605,3.118] |
| Observations              | 538                  |               | 538                  |               | 538                  |               | 538                  |               | 538                  |               | 538                  |               |

Exponentiated coefficients; 95% confidence intervals in brackets

\*  $p < 0.05$ , \*\*  $p < 0.01$ , \*\*\*  $p < 0.001$

Associations are from results of Multiple Imputation with Chained Equations (MICE), imputing missing data for covariates (Exposure to stylish living activities and transactional sex at baseline) and subsequent behaviors for the 188 participants lost to follow up

§ Baseline behavior refers to the respective sexual risk behavior at the baseline visit (Visit 1)
